1 **Title: Is what you see what you get? The relationship between field observed and actual aphid**  
2 **parasitism rates in canola crops**

3

4 **Short running title: Relationships between field observed and actual aphid parasitism rates in**  
5 **canola**

6

7 Samantha Ward<sup>1\*</sup>, Paul A. Umina<sup>1,3</sup>, Hazel Parry<sup>2</sup>, Amber Balfour-Cunningham<sup>4</sup>, Xuan Cheng<sup>1</sup>,  
8 Thomas Heddle<sup>5</sup>, Joanne C. Holloway<sup>6</sup>, Caitlin Langley<sup>6</sup>, Dustin Severtson<sup>4</sup>, Maarten Van Helden<sup>5,7</sup> &  
9 Ary A. Hoffmann<sup>1</sup>

10

11 <sup>1</sup>*School of BioSciences, The University of Melbourne, Parkville, VIC 3010, Australia.*

12 <sup>2</sup>*CSIRO Entomology, Black Mountain, GPO Box 1700, Canberra, ACT 2601, Australia*

13 <sup>3</sup>*Cesar Australia, 293 Royal Parade, Parkville, VIC 3052, Australia.*

14 <sup>4</sup>*Department of Primary Industries and Regional Development, 75 York Road, Northam, WA, 6401,*  
15 *Australia*

16 <sup>5</sup>*South Australian Research and Development Institute, Entomology, Waite Building, Waite Road,*  
17 *Urrbrae, SA 5064, Australia.*

18 <sup>6</sup>*New South Wales Department of Primary Industries, Wagga Wagga Agricultural Institute, Pine Gully*  
19 *Road, Wagga Wagga, NSW 2650, Australia.*

20 <sup>7</sup>*The University of Adelaide, Adelaide, SA 5005, Australia.*

21

22 \*Corresponding author. Email: [sameward1@gmail.com](mailto:sameward1@gmail.com), ORCID: 0000-0003-3400-8900

23

## 24 **Abstract**

25

26 BACKGROUND: Estimating parasitoid abundance in the field can be difficult, even more so when  
27 attempting to quantify parasitism rates and the ecosystem service of biological control that  
28 parasitoids can provide. To understand how ‘observed’ parasitism rates (in-field mummy counts) of  
29 the green peach aphid, *Myzus persicae* (Sulzer) (Homoptera: Aphididae) translate to ‘actual’  
30 parasitism rates (laboratory-reared parasitoid counts), field work was undertaken in Australian  
31 canola fields over a growing season. Parasitoids were reared within a controlled laboratory setting.

32

33 RESULTS: Total observed and actual parasitism rates of *M. persicae* varied considerably across  
34 regions, but less so on a field level. Overall, actual parasitism was on average 2.4 times higher than

35 that observed in the field, with rates an average of 4-fold higher in South Australia. As crop growth  
36 stage progressed, the percentage of mummies observed increased. Percentage of parasitoids reared  
37 also increased with crop growth stage, averaging 3.4% during flowering and reaching 14.4% during  
38 podding/senescing. Although there was a greater diversity of reared parasitoid species at later crop  
39 growth stages, actual parasitism rate was unaffected by parasitoid species. *Diaeretiella rapae* was  
40 the most commonly reared parasitoid, increasing in abundance with crop growth stage.

41

42 CONCLUSION: These findings indicate that mummy counts alone do not provide a clear  
43 representation of parasitism within fields.

44

45 **Keywords:** Canola, Aphididae, Aphidiinae, biological control, Hymenoptera

46

## 47 1. Introduction

48

49 The green peach aphid, *Myzus persicae* (Sulzer) (Homoptera: Aphididae), is an important agricultural  
50 pest worldwide and was first recorded in Australia in New South Wales (NSW), in 1910<sup>1</sup>. Globally, at  
51 least 50 parasitoid species have been reported to attack *M. persicae*<sup>2</sup>, as listed by van Emden et al.  
52 (1969)<sup>3</sup>. In Australia, although many of these natural enemies are present, little research has been  
53 undertaken to investigate parasitoid species composition, the use of parasitoids as biological control  
54 agents of *M. persicae*, the thresholds required to suppress *M. persicae* populations, and the effect of  
55 seasonal changes on naturally occurring populations and parasitism rates.

56

57 Estimating parasitoid abundance in the field can be difficult, even more so when attempting to  
58 understand in-field parasitism rates. Often a parasitized aphid can be identified visually; parasitoids  
59 protect themselves by pupating within the eaten-out husk of their aphid host after cementing it to  
60 the substrate. This husk is usually referred to as a 'mummy'<sup>4</sup>. Within Australia, growers and  
61 agronomists may use in-field mummy counts as an indicator of aphid parasitoid activity. Based on  
62 their findings, usually as part of an Integrated Pest Management (IPM) program, growers judge  
63 whether a field should be chemically treated to reduce pest aphid abundance, or whether parasitoid  
64 numbers are sufficient to control the aphid populations without the need for spraying. Furthermore,  
65 growers can opt to invest in (often more expensive) selective insecticides, as opposed to (often  
66 cheaper) broad-spectrum insecticides, to protect the aphid parasitoids if they are thought to be  
67 providing control of aphids longer term. Unfortunately, however, these crude counts using  
68 mummies can prove inaccurate.

69

70 Powell et al. (1996)<sup>5</sup> suggested that aphid mummy counts should be combined with other methods  
71 to estimate parasitoid abundance, because the sampling method alone could lead to misleading  
72 results. Mummified aphids may not be distinguishable from unparasitized individuals for several  
73 days, resulting in an underestimate of total parasitism. Mummified aphids change into a golden  
74 yellow colour, the recognisable trait of mummification, approximately 72 hours after oviposition at  
75 23°C<sup>6</sup>. Based on visual monitoring alone, any *M. persicae* mummified at this temperature in the field  
76 <72 hours prior could be incorrectly presumed to be unparasitized. Uncertainty is likely to be higher  
77 as temperature drops and/or becomes more variable. Another reason is that strong wind or heavy  
78 rain can dislodge mummies from plant leaves<sup>5</sup>.

79

80 In the field, regardless of host species, many parasitoids are likely to die during development, with  
81 Nielsen and Hajek (2005)<sup>7</sup> noting an overall rate of 56% non-emergence across hosts. Dissection of  
82 mummies that failed to rear parasitoids revealed the parasitoid to be either dead or diapausing<sup>8</sup>.  
83 Walton et al. (1990)<sup>8</sup> found that mummy counts generally underestimated parasitism levels, when  
84 compared to live rearing or electrophoresis. Giles et al. (2003)<sup>9</sup> also noted a weak relationship  
85 between the proportions of tillers with mummies against proportions of parasitised aphids in wheat  
86 and these authors suggested that simultaneous aphid and parasitoid sampling is required to  
87 determine whether chemical applications are required<sup>9</sup>. These findings reinforce the notion that  
88 mummy counts alone are unlikely to provide sufficient information to accurately estimate parasitoid  
89 density.

90

91 The aims of this paper were to understand how observed parasitism rates of *M. persicae* relate to  
92 the actual parasitism rates in canola fields (*Brassica napus* L.) throughout Australia, and whether  
93 these rates varied through the growing season as well as across regions. We also investigated  
94 whether these rates varied spatially across a field, in relation to the distance from the field edge, and  
95 whether the composition of aphid parasitoids affected estimates of observed and actual parasitism  
96 rates.

97

## 98 2. Materials and Methods

99

### 100 2.1. Site selection

101

102 In 2019, 10-13 seed-treated canola fields, at least 1 km from one another, were surveyed for *M.*  
103 *persicae* in each of the following states: New South Wales (NSW), South Australia (SA), Victoria (VIC),  
104 and Western Australia (WA). Site visits were conducted from June/July 2019 every four weeks. Once  
105 aphids were detected, only five fields with *M. persicae* in SA and WA, six in NSW, and seven in VIC,  
106 continued to be sampled until the end of the season (as defined by the time of windrowing of the  
107 crop) (Fig. 1). Selection of these fields was based on insecticide usage, with preference given to  
108 those with no sprays.  
109  
110

111  
112  
113  
114  
115  
116  
117  
118  
119  
120  
121  
122  
123  
124  
125  
126  
127  
128  
129  
130  
131  
132

a

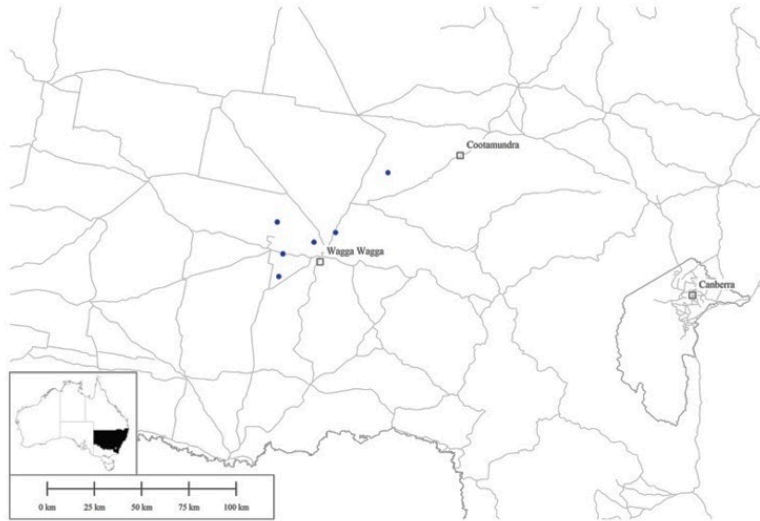

b

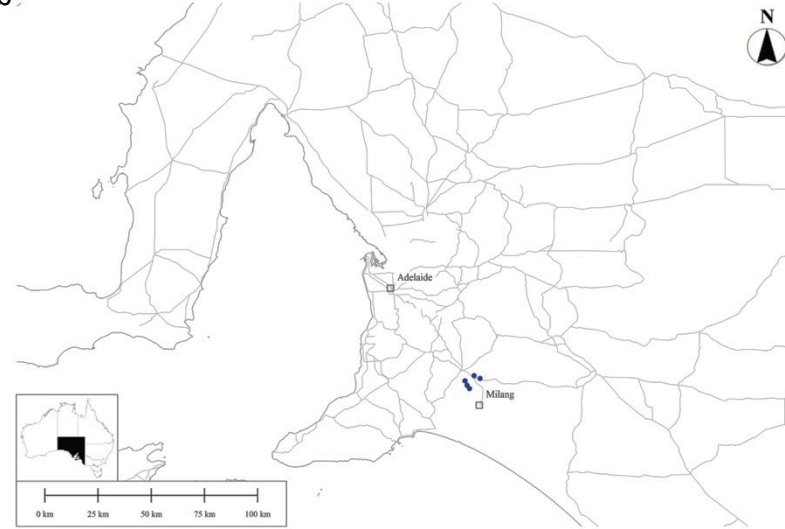

c

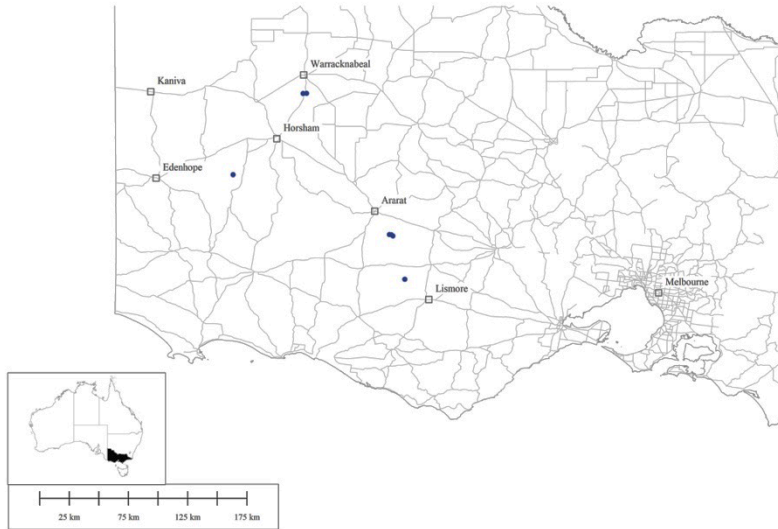

d

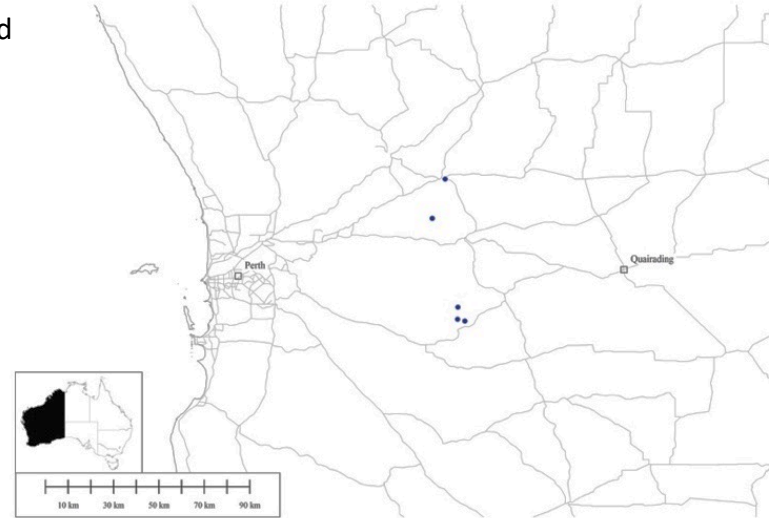

Figure 1: Map of field sites in each state: a) NSW, b) SA, c) VIC, and d) WA (inset maps depict states on Australian map)<sup>10,11</sup>.

133 2.2. Aphid collections

134

135 Plants within fields were sampled directly by hand for the presence of aphids and mummies, at  
136 sampling points at least 30 m from one another. Plant condition was categorised as ‘unstressed’,  
137 where plants looked healthy and turgid, or ‘stressed’ where plants were wilting, had a yellowing of  
138 or dull colour to leaves, were stunted, patchy, or had white feeding marks on the leaves, or a  
139 combination of the above. Stressed plants were targeted, and searches began at the edge of the  
140 crop, moving into the field, in a zigzag formation, reaching a distance of >100 m from the field edge.  
141 Plants were searched with a focus on the underside of the lower leaves of canola plants due to this  
142 being the most common location for *M. persicae*<sup>12</sup>. *Myzus persicae* was targeted and prioritised over  
143 other aphid species when present, however the presence of cabbage aphid (*Brevicoryne brassicae*  
144 L.) and turnip aphid (*Lipaphis erysimi* (Kaltenbach)), was noted. Each sampling point was searched at  
145 random for *M. persicae* aphids and mummies for one minute, or until the combined count of these  
146 reached 50 individuals, whichever occurred first. Sampling points were inspected until eight sites  
147 positive for *M. persicae* were logged. If *M. persicae* was absent, a sampling point was recorded,  
148 before another point was selected for inspection, until a maximum of 24 sampling points had been  
149 inspected at each field.

150

151 Direct sampling of aphids was undertaken with the help of a mobile software application developed  
152 for this project by Andy Hulthen (CSIRO) for electronic data collection using the Open Data Kit  
153 described in Hartung et al. (2010)<sup>13</sup>. The application accessed the in-built GPS and location-based  
154 services of the mobile phone as well as a barcode-reading capability for recording individual samples  
155 labelled with barcodes. The application was used to electronically record field-derived (and  
156 subsequently lab-derived) data. The data were uploaded directly to a database in the Cloud (when in  
157 mobile internet range). Collectors followed prompts on the field mobile application, noting several  
158 variables, such as crop growth stage, plant condition, alate/nymph presence, and natural enemy  
159 presence (see Tables S1, S2).

160

161 Aphids and mummies were kept on their respective leaves and stored, along with paper towelling  
162 and leaves lacking aphids, in a sealed container. Each sampling container was labelled with a  
163 barcode that corresponded with the phone application record. Samples were kept refrigerated or on  
164 ice for transport to the laboratory.

165

### 166 2.3. Laboratory work

167

168 Parasitoids were reared from both field-collected aphids and mummies as described below and then  
169 identified to species. For material collected from NSW fields, data was not recorded on whether a  
170 parasitoid emerged from the mummies or the aphids collected from the field. For the other states,  
171 these two groups were recorded separately. Consequently, NSW data was omitted from some  
172 analyses.

173

#### 174 2.3.1. Rearing from field collected mummies

175

176 All mummies collected from a sampling point were placed into a petri dish lined with moist filter  
177 paper. The underside of each petri dish was labelled with the corresponding barcode and placed  
178 within a controlled temperature (CT) cabinet maintained at 20°C and a 16L:8D photoperiod. For two  
179 weeks, petri dishes were checked every second day for parasitoid emergence. Once a parasitoid  
180 emerged, it was stored in 80 % ethanol, and labelled with a corresponding barcode. Parasitoids  
181 reared from the same sampling point were stored together.

182

#### 183 2.3.2. Rearing from field collected (non-mummified) aphids

184 Petri dishes were made up with a 1 % agar solution, within which 2-3 cotyledons of canola or  
185 sprouting radish (*Raphanus raphanistrum* subsp. *sativus* L.) were inserted. The lid was lined with  
186 filter paper. Aphids from the same sampling point were placed onto the cotyledons, unless numbers  
187 were very high (~50 or above), in which case multiple petri dishes were used. Each dish was labelled  
188 on the underside with the corresponding barcode and placed within the CT cabinet maintained at  
189 20°C and a 16L:8D photoperiod. Leaves were changed weekly, or if limp or discoloured, or if fungus  
190 began to appear. Any mummies that developed were removed and placed in a separate petri dish.  
191 These mummies were checked every second day for parasitoid emergence for two weeks from  
192 collection. Once the parasitoid emerged it was stored in 80 % ethanol separate to the mummy case.  
193 At the end of the two weeks, all aphids that remained unparasitized were stored in 80 % ethanol.  
194 For NSW, parasitoids produced from mummies and non-mummified aphids were combined within  
195 the same tubes with 80 % ethanol. All parasitoids reared from *M. persicae* were stored at 4°C and  
196 identified morphologically to species level, using keys by Rakhshani et al. (2012,2015)<sup>14,15</sup>.

#### 197 2.3.3. DNA extraction methods & PCR amplification

198

199 Parasitoid DNA was extracted non-destructively using a modified Chelex<sup>®</sup> extraction method,  
200 adapted from Walsh et al. (1991)<sup>16</sup>, as detailed in Carew et al. (2003)<sup>17</sup>. An individual parasitoid was  
201 placed within a micro-centrifuge tube, along with 3 µl of Proteinase K (20mg/ml) and 70 µl of 5 %  
202 Chelex<sup>®</sup> solution, before being incubated in a water bath. PCR was undertaken using a 10 % dilution  
203 of the DNA extractions, amplifying the samples with the “universal” arthropod primer pair  
204 LCO1490/HCO2198<sup>18</sup>. Reactions contained a final concentration of 1x Standard Taq Reaction Buffer  
205 (New England Biolabs, Massachusetts, USA), 2.5 mM MgCl<sub>2</sub>, 0.5 µM each primer, 0.2 mM dNTPs, 2.4  
206 U IMMOLASE DNA Polymerase (Bioline, London, UK) and 3 µL diluted DNA, in a reaction volume of  
207 30 µL. Amplicons were sent to the Australian Genome Research Facility (AGRF) for sequencing,  
208 before forward and reverse sequences were assembled and trimmed using Geneious version 9.1.8  
209 (<https://www.geneious.com>). Sequences were identified using the Genbank database  
210 (<http://www.ncbi.nlm.nih.gov>) and cross-referenced with the Barcode of Life Data System database  
211 (BOLD; <http://www.barcodinglife.org>)<sup>19</sup>.

212

#### 213 *2.4. Data analyses*

214

215 Parasitism rates were calculated in two ways. The first was the ‘observed parasitism’ rate computed  
216 as the number of mummies observed in the field compared to the total number of aphids and  
217 mummies collected. The second was the ‘actual parasitism’ rate, defined as the number of  
218 parasitoids that were reared divided by the number of aphids and mummies that were sourced. The  
219 ratio of parasitoids reared from mummies collected from the field (‘field mummies’) over the  
220 number reared from aphids collected from the field that subsequently became mummified (‘field  
221 aphids’) was also investigated in order to assess the extent to which field mummy counts might  
222 underestimate parasitoid impact.

223

224 General Linear Models (GLMs), with fields as a factor nested within states, were undertaken to  
225 analyse the effects of state, field, crop growth stage, and crop stress on the variables. Count data  
226 were log transformed (ln(X+1)) prior to analysis as they were not normally distributed, while  
227 proportion data were logit transformed as recommended by Warton et al. (2011)<sup>20</sup>. We used this  
228 approach rather than treating the presence of alates, mummies and parasitoids as binomial  
229 variables because of the uneven sampling and patchy distribution of aphids, and potentially  
230 parasitism, across fields. Note that proportions were based on the presence of at least 18  
231 aphids/alates/mummies. Proportions of parasitoids reared were based on the presence of at least



232 one aphid. Crop growth stage was considered a factor due to the categorical nature of the variable,  
233 and stages prior to flowering were excluded from analysis due to the rarity of aphids. The difference  
234 between the number of parasitoids reared from field mummies over the number reared from field  
235 aphids was also investigated in order to assess the extent to which field mummy counts might  
236 underestimate parasitoid impact. Post hoc Tukey's multiple comparison tests were undertaken to  
237 determine which means differed.

238

239 To explore the relationships between abundance of *M. persicae*, proportion of mummies from total  
240 aphids sampled, and proportion of parasitoids reared against distance from field edge, GLMs were  
241 performed on data with distance from edge as a covariate, after collating data across all growth  
242 stages. For these analyses, any fields with fewer than 10 aphids or parasitoids reared were removed.

243

244 To assess associations between the measures of parasitism as well as aphid counts, Spearman rank  
245 correlations were computed at the field level, per crop growth stage. When comparing *M. persicae*  
246 abundance with mummy counts/proportions, data were excluded when parasitism was absent. We  
247 also tested whether observed and actual parasitism differed across all spatial data points where  
248 parasitism was recorded (pooled across crop growth stages) by using a Sign test.

249

250 For the analysis of parasitoid species composition, parasitoid counts were summed across sampling  
251 points within a field before multiple response permutation procedures (MRPPs) were used to  
252 investigate the effects of state, crop stress, crop growth stage, and field on parasitoid species  
253 composition, with Euclidean distance as a similarity measure. Paired t-tests were undertaken to  
254 compare the proportion of *D. rapae* to the other parasitoids when reared from field aphids versus  
255 field mummies.

256

257 All analyses were conducted using Minitab version 19.1.0.0<sup>21</sup>, with the exception of the MRPPs,  
258 which were performed in R version 4.0.1<sup>22</sup>, using RStudio version 1.3.959<sup>23</sup>.

259

### 260 **3. Results**

261

262 *3.1. Myzus persicae abundance at a field level and the proportion of alates, mummies and reared*  
263 *parasitoids*

264

265 During 2019, 11246 non-mummified *M. persicae* were collected, with 3578 from sampling points in  
 266 NSW, 4218 in SA, 585 in VIC, and 2865 in WA (Fig. S1a). In all states, *Myzus persicae* presence varied  
 267 over time, with no aphids found during the seedling crop growth stage, and very few during the  
 268 vegetative stage. Aphids were first recorded in low numbers in VIC in early August and in the other  
 269 states in mid-July. The non-mummified *M. persicae* counts were significantly different between  
 270 states, but not between fields (Table 1), with the fewest mean aphids per field found in VIC (Figs. 2a,  
 271 S1a). There was no difference in aphid numbers collected per field at the three later crop growth  
 272 stages (flowering, flowering/podding, podding/senescence) and no impact of crop stress on  
 273 numbers (Table 1). In NSW, most sampling was undertaken during the flowering crop growth stage  
 274 (43 % of visits), in VIC during the flowering/podding stage (44 %), in WA during the  
 275 flowering/podding and podding/senescing stages (36 %), and in SA during the podding/senescing  
 276 crop growth stage (41 %).

277

278 *Table 1:* Results of GLMs testing the effects of state, field, crop growth stage and crop stress on *M.*  
 279 *persicae* numbers, and proportions of alates, mummies, and reared parasitoids considered at the  
 280 field level.

| Organism & measurement                             | Factor                      | MS     | F <sub>(df1, df2)</sub>  | P                |
|----------------------------------------------------|-----------------------------|--------|--------------------------|------------------|
| <b>Mean <i>Myzus persicae</i> abundance</b>        | State                       | 5.811  | 11.64 <sub>(3, 19)</sub> | <b>&lt;0.001</b> |
|                                                    | Field (nested within state) | 0.563  | 1.13 <sub>(19, 35)</sub> | 0.369            |
|                                                    | Crop growth stage           | 1.180  | 2.36 <sub>(2, 35)</sub>  | 0.109            |
|                                                    | Crop stress                 | 0.864  | 1.73 <sub>(1, 35)</sub>  | 0.197            |
|                                                    | Error                       | 0.499  |                          |                  |
| <b>Proportion of alates</b>                        | State                       | 5.158  | 4.84 <sub>(3, 17)</sub>  | <b>0.009</b>     |
|                                                    | Field (nested within state) | 0.583  | 0.55 <sub>(17, 25)</sub> | 0.899            |
|                                                    | Crop growth stage           | 1.545  | 1.45 <sub>(2, 25)</sub>  | 0.253            |
|                                                    | Crop stress                 | 1.177  | 1.11 <sub>(1, 25)</sub>  | 0.303            |
|                                                    | Error                       | 1.065  |                          |                  |
| <b>Proportion of mummies</b>                       | State                       | 5.599  | 3.85 <sub>(3, 19)</sub>  | <b>0.019</b>     |
|                                                    | Field (nested within state) | 2.311  | 1.59 <sub>(19, 30)</sub> | 0.125            |
|                                                    | Crop growth stage           | 41.643 | 28.61 <sub>(2, 30)</sub> | <b>&lt;0.001</b> |
|                                                    | Crop stress                 | 0.003  | 0.00 <sub>(1, 30)</sub>  | 0.962            |
|                                                    | Error                       | 1.456  |                          |                  |
| <b>Proportion of reared parasitoids (exc. NSW)</b> | State                       | 2.088  | 1.78 <sub>(2, 14)</sub>  | 0.192            |
|                                                    | Field (nested within state) | 1.212  | 1.03 <sub>(14, 23)</sub> | 0.459            |
|                                                    | Crop growth stage           | 6.461  | 5.50 <sub>(2, 23)</sub>  | <b>0.011</b>     |
|                                                    | Crop stress                 | 4.903  | 4.17 <sub>(1, 23)</sub>  | 0.053            |
|                                                    | Error                       | 1.175  |                          |                  |

281

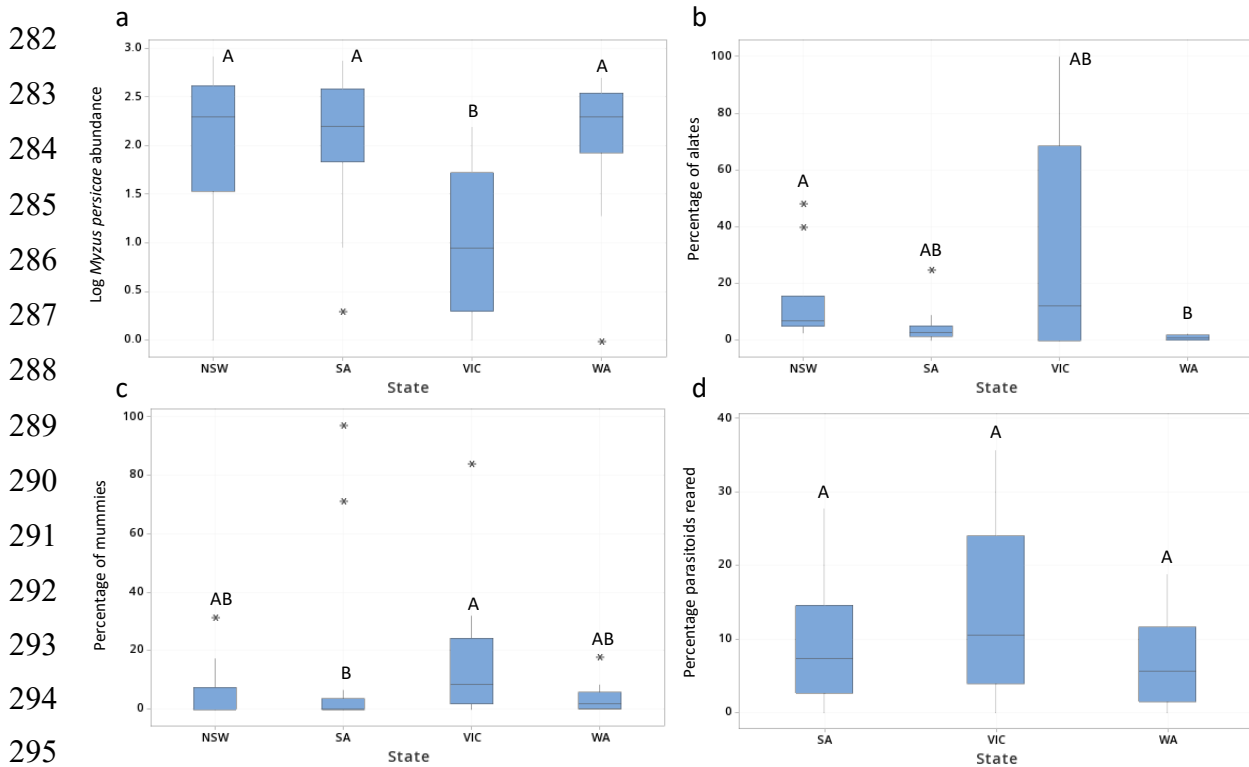

296 **Figure 2:** Box plots showing by state, a) *M. persicae* abundance, and the percentage of b) alates, c)  
 297 mummies and d) reared parasitoids on fields excluding those in NSW. [Outliers are indicated by  
 298 single asterisks. Different letters indicate significant differences between states in post hoc tests].  
 299

300 The proportion of *M. persicae* alates from total aphids sampled also differed significantly by state  
 301 (Table 1), with the proportion of alates significantly higher in NSW than in WA (Fig. 2b). The  
 302 proportion of alates was not affected by field, crop growth stage or crop stress (Table 1).  
 303

304 During 2019, 515 mummies were collected, with 145 in NSW (4 % of total *M. persicae* collected in  
 305 this state), 148 in SA (4 %), 52 in VIC (9 %) and 170 in WA (6 %) (Fig. S1b). No mummies were found  
 306 in NSW, SA, and WA until August, and September in VIC. For the proportion of aphids that were  
 307 collected as mummies, there was a significant effect of state (Table 1), with significantly higher  
 308 proportions found in VIC than in SA (Fig. 2c). Crop growth stage also significantly affected the  
 309 proportion of mummies collected (Fig. 3a; Table 1), with a significantly higher proportion of  
 310 mummies collected during the podding/senescing stage, than during the flowering and  
 311 flowering/podding stages (Fig 3a). No mummies were found during the seedling stage and only one  
 312 during the vegetative stage (from NSW). The increase in the proportion of mummies at later crop  
 313 growth stages reflects an increase in field parasitism estimates consistent across all the states except  
 314 in NSW (Fig. 3a). The proportion of mummies from total aphids collected was not affected by field or  
 315 by crop stress (Table 1).

316

317

318

319

320

321

322

323

324

325

326

327

328

329

330

331

332

333

334

335

336

337

338

339

340

341

342

343

344

345

346

347

348

349

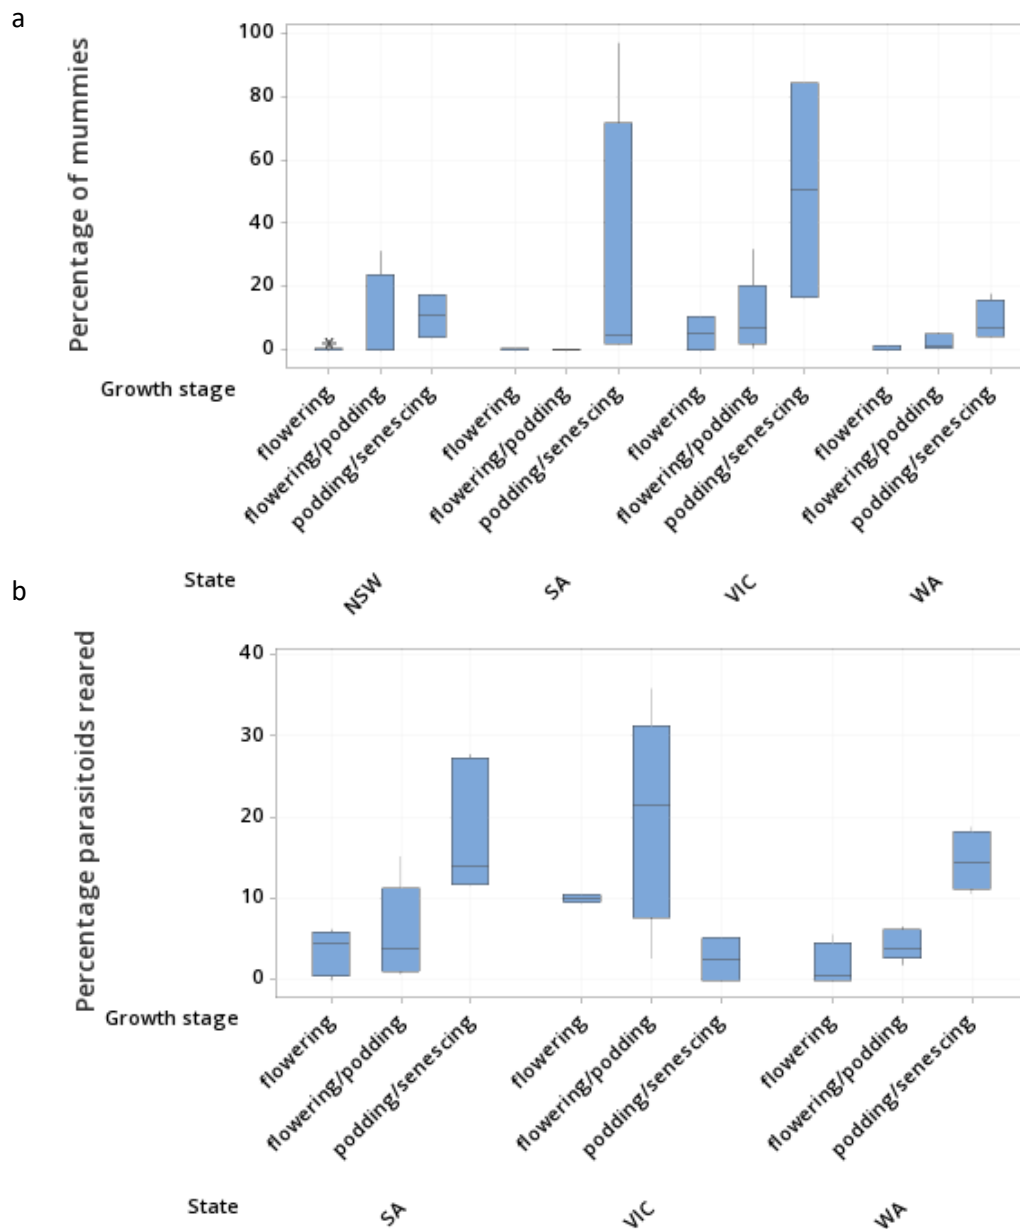

Figure 3: Box plots displaying effects of crop growth stage on a) percentage of samples collected as mummies per state and b) the percentage of samples collected which reared parasitoids per state. [Outliers are indicated by single asterisks. A post hoc test found the percentage of mummies from total aphids collected was significantly higher during the podding/senescing crop growth stage than during flowering or flowering/podding]. A post hoc test found the percentage of mummies from total aphids collected was significantly higher during the podding/senescing crop growth stage than during flowering].

Parasitism as measured by reared parasitoids showed significant effects of crop growth stage, but no effect of state, field, or crop stress (Table 1). As was the case for mummification rates, the

350 proportion of reared parasitoids from total aphids and mummies collected increased with crop  
351 growth stage in both SA and WA, although this was not the case in VIC (Fig. 3b).

352

### 353 *3.2. Comparison of observed and actual rates of parasitism*

354

355 Across all fields, 515 mummies were sampled during this study, while 1221 parasitoids were  
356 successfully reared in the laboratory, suggesting that the total actual parasitism rate was overall 237  
357 % higher than that estimated in the field based on mummy counts (observed parasitism rate). At the  
358 state level, 145 mummies were collected, and 233 parasitoids were reared in NSW, presenting an  
359 actual parasitism rate that was 161 % of the observed parasitism rate; similarly, 148 mummies were  
360 collected, and 606 parasitoids reared in SA (409%), 52 mummies were collected, and 92 parasitoids  
361 were reared in VIC (177 %), and 170 mummies were collected, and 290 parasitoids were reared in  
362 WA (171 %).

363

364 Comparing observed and actual parasitism rates at the field level, of the 61 fields sampled  
365 (separated by time points), 27 had higher actual parasitism rates than observed parasitism rates (44  
366 %), 15 had the same parasitism rates (25 %), and 19 had less actual parasitism than observed (31 %;  
367 due to failed rearings). We also looked at observed and actual parasitism rates at the level of  
368 individual sampling points in a field. When combined over time, of the 88 sampling points that were  
369 repeatedly sampled, where parasitism was observed as either field mummy counts or resulted in  
370 reared parasitoids in SA, VIC and WA, 83 % (73) had higher actual parasitism than observed  
371 parasitism, 10 % (9) had the same parasitism rates, and 7 % (6) had less actual parasitism than  
372 observed. These comparisons support the notion that actual parasitism was higher than observed  
373 parasitism, particularly at the finer scale of sampling point (Sign test,  $p < 0.001$ ). On a field level, when  
374 parasitism occurred, the difference in observed and actual parasitism rate (number of parasitoids  
375 reared subtracted by mummy count) did not vary across state, field, crop growth stages or crop  
376 stress (GLM: state  $MS=0.364$ ,  $F_{2,12}=0.97$ ;  $p=0.397$ ; field  $MS=0.050$ ,  $F_{12,18}=0.13$ ;  $p=1.000$ ; crop growth  
377 stage  $MS=0.234$ ,  $F_{2,18}=1.18$ ,  $p=0.546$ ; crop stress  $MS=0.060$ ,  $F_{1,18}=0.16$ ,  $p=0.695$ ; error  $MS=0.374$ )  
378 (Fig. 4).

379

380

381

382

383

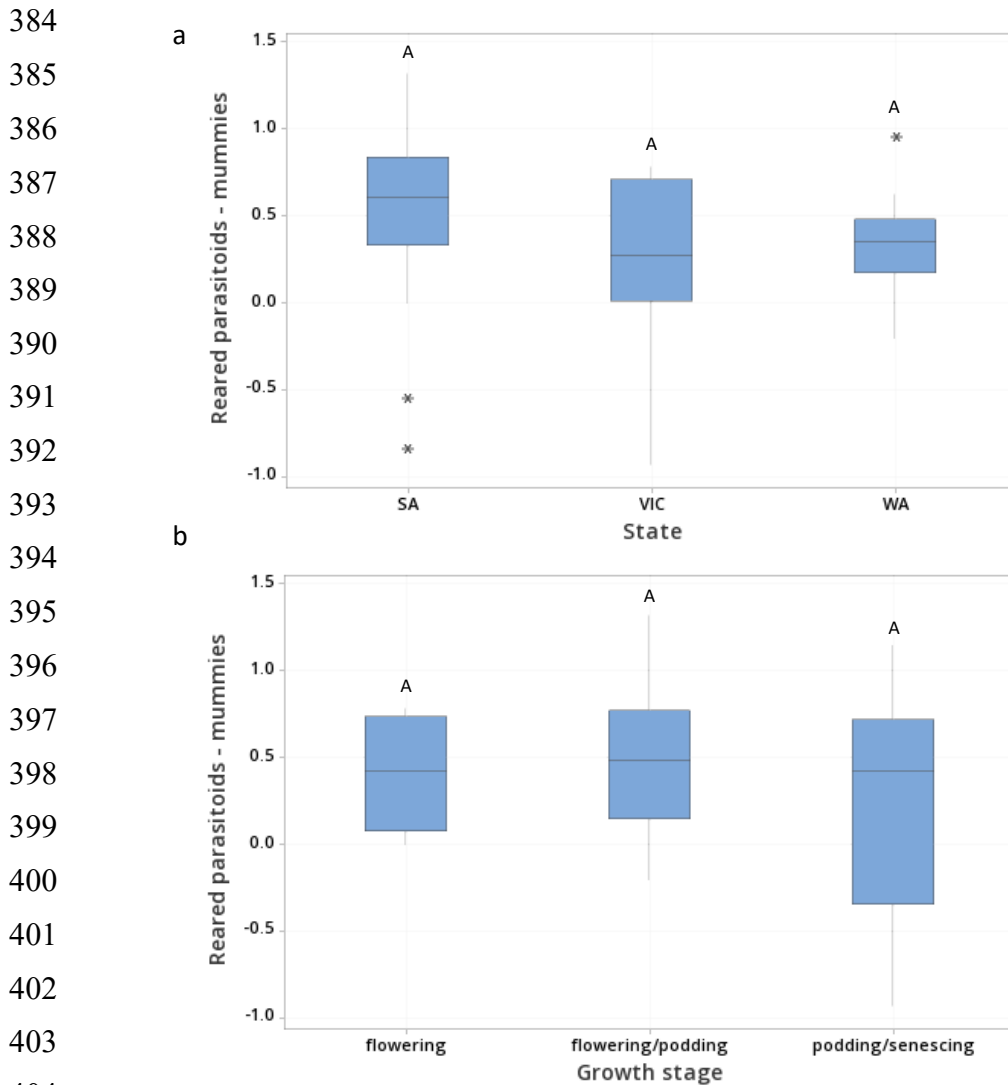

405 *Figure 4: Box plots displaying effects of a) states and b) crop growth stage on the difference between*  
406 *the number of parasitoids reared and the mummies collected [Outliers are indicated by single*  
407 *asterisks].*

### 409 3.3. Correlations between parasitism and aphid abundance

410  
411 We tested at a field level whether there were associations between aphid, mummy, and parasitoid  
412 abundance in addition to proportions of mummies and parasitoids reared. Mummy counts were  
413 negatively correlated with *M. persicae* counts during the flowering/podding stage (Spearman; n=14,  
414  $r=-0.535$ ,  $p=0.049$ ) but were not correlated during the podding/senescing stage (Spearman; n=16,  $r=-$   
415  $0.050$ ,  $p=0.854$ ). Reared parasitoid numbers were not correlated with *M. persicae* counts during the  
416 flowering/podding stage (Spearman; n=17,  $r=0.336$ ,  $p=0.187$ ), yet were strongly positively correlated  
417 during the podding/senescing stage (Spearman; n=15,  $r=0.845$ ,  **$p<0.001$** ) (Fig. S2). Reared parasitoid

418 numbers positively correlated with mummy counts during the flowering/podding stage (Spearman;  
419  $n=17$ ,  $r=0.601$ ,  $p=0.011$ ), yet were not correlated during the podding/senescing stage (Spearman;  
420  $n=15$ ,  $r=0.350$ ,  $p=0.201$ ) (Fig. S3).

421

422 Proportions of field mummies were not correlated with *M. persicae* abundance during the  
423 flowering/podding stage (Spearman;  $n=21$ ,  $r=-0.226$ ,  $p=0.324$ , but were negatively correlated during  
424 the podding/senescing stage (Spearman;  $n=16$ ,  $r=-0.888$ ,  $p<0.001$ ). Proportions of reared parasitoids  
425 were not correlated with *M. persicae* abundance during the flowering/podding stage (Spearman;  
426  $n=17$ ,  $r=-0.083$ ,  $p=0.750$ ) or the podding/senescing stage (Spearman;  $n=13$ ,  $r=0.440$ ,  $p=0.133$ ). An  
427 increase in aphid abundance at the end of the season therefore led to a decrease in observed  
428 parasitism but not actual parasitism. Proportions of mummies and proportions of reared parasitoids  
429 were highly correlated during the flowering/podding stage (Spearman;  $n=17$ ,  $r=0.640$ ,  $p=0.006$ )  
430 however were not correlated during the podding/senescing stage (Spearman;  $n=13$ ,  $r=-0.335$ ,  
431  $p=0.263$ ). These analyses show how parasitism rates in fields can be independent of aphid counts  
432 but also how mummification rates may give a different picture on the control provided by  
433 parasitoids in a field.

434

#### 435 3.4. *Myzus persicae* abundance and parasitism spatially within a field

436

437 Although our sampling in the field did not proceed perpendicularly from the field edge but  
438 proceeded in a zigzag fashion, the distance from the field edge varied suitably to consider distance  
439 effects within this context. Only the first eight sampling points (~210 m moved from the field edge)  
440 were used in the analysis as these sampling distances were repeated each visit, regardless of aphid  
441 presence/absence. Although there was a state and field effect on abundance of *M. persicae*, there  
442 was no effect of distance from the field edge (GLM: state  $MS=61.436$ ,  $F_{3,19}=207.53$ ;  $p<0.001$ ; field  
443  $MS=3.125$ ,  $F_{19,160}=10.56$ ;  $p<0.001$ ; distance from field edge  $MS=1.120$ ,  $F_{1,160}=3.78$ ,  $p=0.054$ , error  
444  $MS=0.296$ ) (Fig. S4a). Again, although there was a state and field effect, the proportion of mummies  
445 sampled from *M. persicae* was not affected by distance from the field edge (GLM: state  $MS=3.087$ ,  
446  $F_{3,19}=5.23$ ;  $p=0.002$ ; field  $MS=3.396$ ,  $F_{19,142}=5.75$ ;  $p<0.001$ ; distance from field edge  $MS=0.387$ ,  
447  $F_{1,142}=0.65$ ,  $p=0.420$ , error  $MS=0.591$ ) (Fig. S4b). The proportion of parasitoids reared was also  
448 affected by state and field but not affected by distance from the field edge (GLM: state  $MS=7.443$ ,  
449  $F_{2,14}=8.69$ ;  $p<0.001$ ; field  $MS=3.647$ ,  $F_{14,99}=4.26$ ;  $p<0.001$ ; distance from field edge  $MS=0.295$ ,  
450  $F_{1,99}=0.34$ ,  $p=0.558$ ) (Fig. S4c). The data therefore suggest a relatively even rate of mummification  
451 and parasitism across these fields.

452

### 453 3.5. Aphid-derived versus mummy-derived parasitoids

454

455 The field mummies, of which 370 were collected from SA, VIC and WA, produced 280 parasitoids,  
456 with a successful rearing rate of 76 %. Of the 7668 non-mummified *M. persicae* observed in SA, VIC  
457 and WA during this study, 708 (9 %) became mummies and produced parasitoids within the  
458 laboratory. The aphids that became mummies but did not produce parasitoids were not analysed. Of  
459 the parasitoids reared, those reared from field aphids constituted 49 % of total parasitoids reared in  
460 WA, 33 % in VIC, and 83 % in SA. On a field level, the number of parasitoids reared from field aphids  
461 strongly positively correlated with the number of parasitoids reared from field mummies (Spearman;  
462  $n=43$ ,  $r=0.637$ ,  $p<0.001$ ). The difference between the number of parasitoids reared from field  
463 mummies and those reared from field aphids (number of parasitoids from field mummies subtracted  
464 by parasitoids from field aphids) was not significantly different across field, crop growth stage, or  
465 crop stress, but was different across states (GLM: state  $MS=8.275$ ,  $F_{2,14}=7.94$ ,  $p=0.002$ ; field  
466  $MS=0.615$ ,  $F_{14,23}=0.59$ ,  $p=0.846$ ; crop growth stage  $MS=2.049$ ,  $F_{2,23}=1.97$ ,  $p=0.163$ ; crop stress  
467  $MS=2.021$ ,  $F_{1,23}=1.94$ ,  $p=0.177$ ; error  $MS=1.042$ ). The difference between the number of parasitoids  
468 reared from field mummies and from field aphids per field was significantly greater in SA than in VIC  
469 (Fig. 5).

470

471

472

473

474

475

476

477

478

479

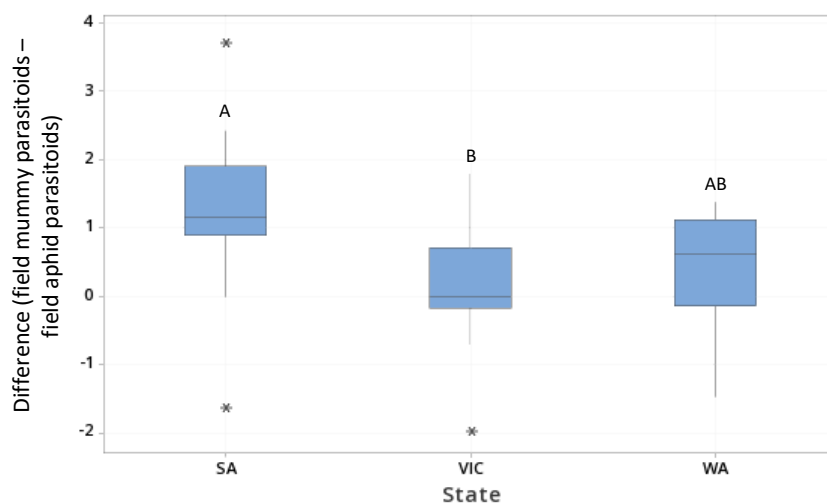

480 *Figure 5:* Box plot displaying effects of state on the difference between the number of parasitoids  
481 reared from field aphids and those reared from field mummies (number of parasitoids from field  
482 mummies subtracted by parasitoids from field aphids) per field. [Outliers are indicated by single  
483 asterisks. Different letters indicate significant differences between growth stages in posthoc tests].

484



485 3.6. *Parasitoid community*

486

487 Primary parasitoids constituted 98 % of all parasitoids reared, hyperparasitoids 2 %, and mummy  
488 parasitoids 0.08 %. Of the primary parasitoids, 73 % of those reared were *D. rapae*, 10 % *Aphidius*  
489 *ervi*, 9 % *Aphidius colemani*, with the other species each constituting <5 % of the total (Fig. S5). No  
490 Aphelinidae were reared during this experiment. Further details of parasitoid composition by state  
491 are given in the supplementary material. Total parasitoid species composition was not different  
492 across fields (MRPP, A=0.009, p=0.293) or states (MRPP, A=0.009, p=0.264), nor did it differ with  
493 crop stress (MRPP, A=0.009, p=0.300). Crop growth stage, however, was found to have a significant  
494 effect on parasitoid species composition (MRPP, A=0.239, p=**0.001**), with there being a greater  
495 variety of parasitoid species as plant growth progressed (Fig. 6).

496

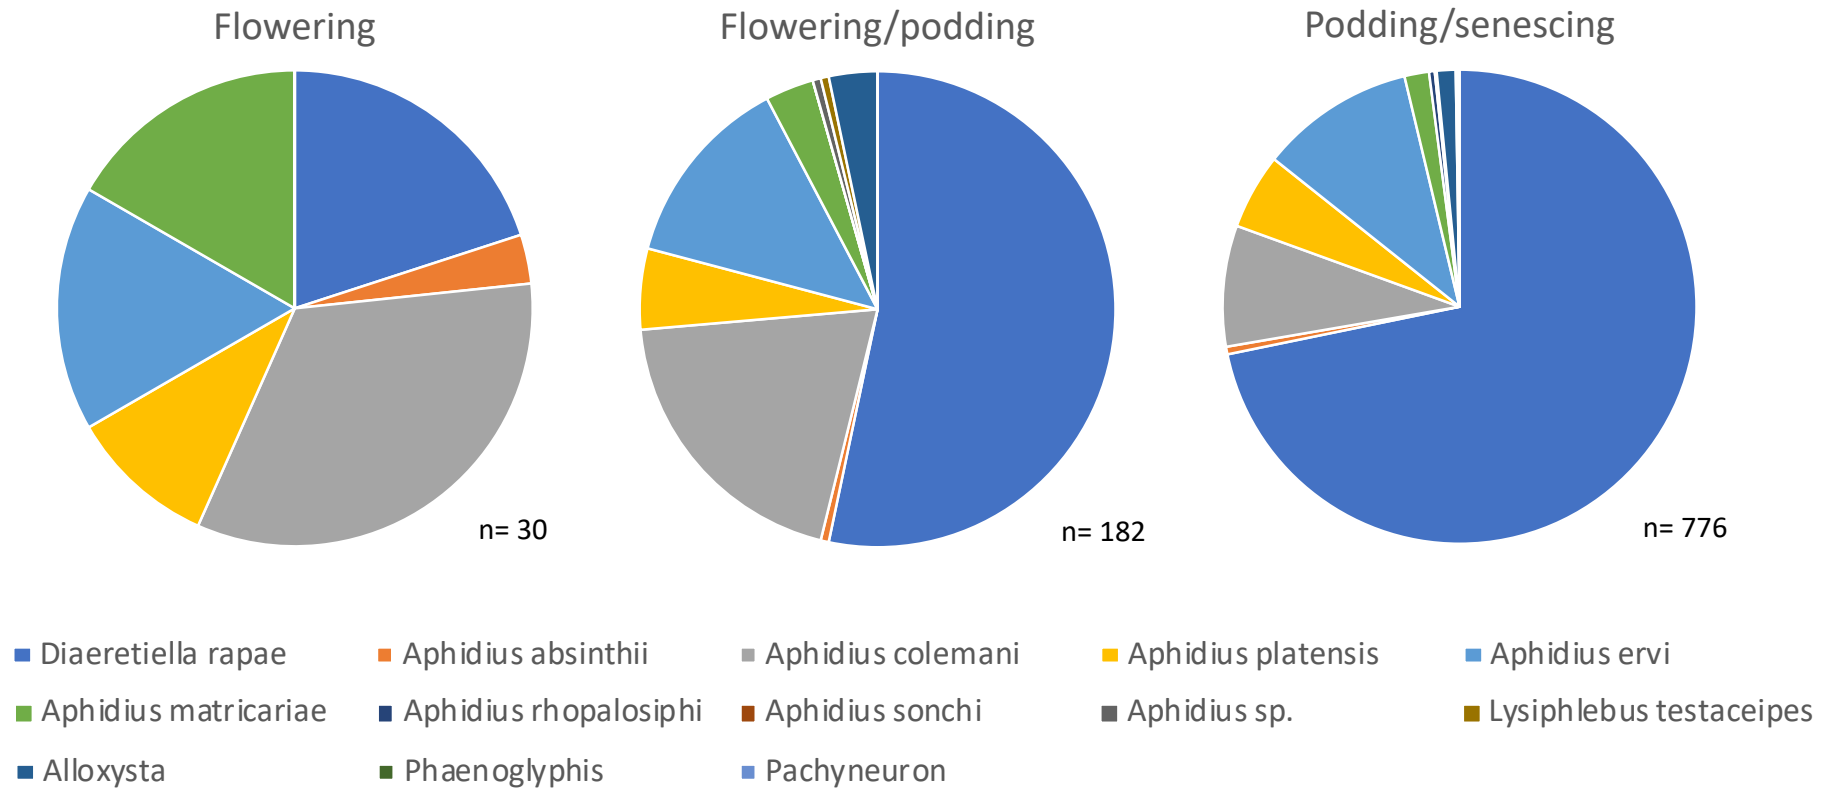

497

498 *Figure 6: Parasitoid composition within canola crops during the different crop growth stages. Note sample sizes below pie charts.*

## 499 4. Discussion

500

### 501 4.1. Parasitism rates

502

503 Aphids were detected in August in VIC and July in the other states. Although possibly present in low  
504 numbers earlier prior to this, we considered this their first successful colonisation, most likely due to  
505 the reduction in efficacy of the canola seed treatments. As expected, due to the timing of aphid  
506 arrival, no mummies were found in NSW, SA, and WA until August, and September in VIC. A delay  
507 between host and parasitoid emergence is generally observed, particularly in annual crops<sup>24</sup>. At the  
508 field level, actual parasitism rate was found to be 2.4 times higher than the observed parasitism rate.  
509 The discrepancy was even greater in SA, with actual parasitism rate 4.1 times higher than observed  
510 parasitism rate. At the sampling point level, actual parasitism rates were higher for 83% of the points  
511 sampled, suggesting that, particularly at this finer scale, observed parasitism usually provides an  
512 underestimate of actual parasitism rates. However, due to differences among fields it is difficult to  
513 make generalizations, likely due to factors such as landscape composition, configuration, and  
514 complexity, and the availability of alternative hosts, and noted in other studies worldwide<sup>25,26</sup>.

515

516 Estimates of parasitism levels based on mummy counts (observed parasitism) only relate to numbers  
517 of parasitoids at pre-pupal and pupal developmental stages<sup>8</sup>. Around 9% of field-aphids became  
518 mummies and successfully reared parasitoids in the laboratory, with the proportion of parasitoids  
519 reared from field-aphids highest in SA. It must be noted, however, that rearing parasitoids within a  
520 laboratory enables control of climatic variables that could fluctuate in the field, thereby causing  
521 failed emergence and parasitoid mortality under more realistic conditions<sup>27</sup>. The difference between  
522 the number of parasitoids reared from field mummies than field aphids being significantly greater  
523 per field in SA could be due to more sampling occurring during the podding/senescing crop growth  
524 stage in this state (at 41%), compared to the other crop growth stages. VIC particularly, had a lot of  
525 sampling undertaken during flowering, most likely due to a slower growth rate due to less  
526 favourable conditions. This could also explain the lower aphid counts in this state, with aphids being  
527 attracted to the yellow colour of the flowering canola and subsequently building in numbers<sup>3</sup>. Any  
528 variation in actual parasitism and observed parasitism might therefore be attributed to crop growth  
529 stage.

530

### 531 4.2. Variation in rates during the canola growing season

532

533 Although *M. persicae* abundance and the proportion of alates were not affected by crop growth  
534 stage, the proportion of mummies sampled was significantly higher during the podding/senescing  
535 growth stage than during earlier crop growth stages, likely due to the delayed presence of  
536 parasitoids in the field. The reason for the lack of crop growth stage effects on *M. persicae*  
537 abundance could be due to a number of overriding contributing factors that affect aphid population  
538 growth, such as elevation, temperature, and/or dew point<sup>28</sup>, in addition to the presence of natural  
539 enemies. Interestingly, stress was not found to affect *M. persicae* abundance, or proportions of  
540 alates, mummies, or parasitoids reared. It has been said that the formation of aphids' wings (and in  
541 turn dispersal) is indirectly linked to plant stress, but directly to overcrowding, which in turn causes  
542 deterioration of the host plant<sup>29</sup>. Plants were identified as 'stressed' based on their appearance,  
543 which could have been caused by any number of factors, including but not limited to, aphid damage,  
544 environment (i.e., moisture or heat stress), or other arthropods (i.e., mite stress); many of which  
545 may not be relevant to aphids or parasitoids.

546

547 Field parasitism was only observed from August and September onwards, and occurred mostly  
548 between the flowering and podding & senescing stages, with parasitoids peaking during  
549 flowering/podding and podding & senescing stages. *Myzus persicae* populations and their parasitism  
550 vary between years<sup>30</sup>, with the aphid occurring early on in the crop when there is a substantial green  
551 bridge (plant material, (i.e., weeds and volunteer plants) surviving over-winter between cropping  
552 seasons, that can act as hosts for pests and beneficials)<sup>31</sup>. Further sampling should be undertaken  
553 across other years to compare findings.

554

555 Although other studies have found that as the season progresses, parasitoids are also more likely to  
556 die or diapause within developing mummies<sup>8</sup>, the proportion of reared parasitoids increased as crop  
557 growth stage progressed in both SA and WA, but not in VIC. This could be due to the later arrival of  
558 aphids in VIC than in the other states, and the subsequent lower proportion of mummies collected.  
559 This knock-on effect could be attributed to more fields being sampled during the flowering growth  
560 stage and fewer during the podding/senescing stage. The proportion of reared parasitoids in VIC was  
561 highest during the flowering/podding stage. Although the flowering/podding crop growth stage in  
562 SA and WA spanned the months of August and September, in VIC some of the sampled crops were  
563 still flowering/podding in November (coinciding with podding/senescing in the other states). At this  
564 time temperatures are higher than earlier in the growing season (~1.5x higher than in June). The  
565 time taken for mummies to form was found to be inversely correlated with the temperature in the  
566 range of 10-25°C for *A. colemani* and *A. matricariae*, for example<sup>32</sup>, suggesting the summer month

567 temperature of November is more suited for aphidiine developmental time. These results suggest  
568 that the increase in proportion of reared parasitoids is probably more influenced by temperature  
569 and seasonal differences rather than the crop growth stage.

570

571 The correlation we observed at the field level between *M. persicae* counts and reared parasitoid  
572 counts suggests that, when scouting a field to determine parasitism, *M. persicae* numbers alone can  
573 be a good indication of the number of parasitoids subsequently reared during the latter growth  
574 stages. The proportion of parasitoids reared, however, cannot be accurately determined using this  
575 method as there appears to be only a weak correlation between these two variables. Moreover, the  
576 data suggest that the relationships between observations in the field and actual parasitism may vary  
577 during the season.

578

#### 579 4.3. Composition of aphid parasitoids

580

581 The parasitoids comprised mostly of primary parasitoids, with *D. rapae* the dominant species.  
582 Secondary parasitoids were very low throughout the season. It is important to assess the presence  
583 of hyperparasitoids (or mummy parasitoids) which could affect the long-term ability of primary  
584 parasitoids to control *M. persicae* populations. Parasitoid species composition was not affected by  
585 state, field or crop stress, but was affected by crop growth stage, with *D. rapae* becoming more  
586 dominant as crop growth stage progressed. This could reflect warmer temperatures during the latter  
587 growth stages, as *D. rapae* developmental time decreases more rapidly than that of other  
588 aphidiines, such as *A. matricariae*, as temperature increases<sup>33</sup>. *Diaeretiella rapae* has been found to  
589 be very tolerant of drought conditions (in the absence of increased temperature), continuing or even  
590 increasing aphid parasitism<sup>34</sup>. This could explain the dominance of this species in southern Australia  
591 given that 2019 was a drought-affected year.

592

593 Additionally, *D. rapae* has a very broad range of host aphids and plants compared to other  
594 aphidiines, and so has the ability to host swap and build up populations outside of the growing  
595 season<sup>35</sup>. More *D. rapae* were reared in WA, likely due to higher abundance of *B. brassicae* in this  
596 state, as this aphid species is reputedly the preferred host of *D. rapae*<sup>36</sup>. It has been recorded that *D.*  
597 *rapae* does not respond to chemical attractants from aphids, as increasing aphid densities did not  
598 affect the arrival time of this parasitoid<sup>37</sup> and may respond instead to volatile compounds from  
599 cruciferous crops<sup>38,39,40</sup>. *Diaeretiella rapae* orientates towards mustard oils produced by crucifers,  
600 causing it to attack aphids on this plant type<sup>41</sup>. This ability to respond to plant volatiles potentially

601 increases its efficacy, as volatile chemicals released by plants can be important when parasitoids  
602 locate hosts<sup>42</sup>.

603

604 The difference between observed and actual parasitism varied little between primary and secondary  
605 parasitoids, and between *D. rapae* and other primary parasitoids, so that parasitoid species  
606 composition had no discernible effect on observed and actual parasitism rates. The difference in  
607 observed and actual parasitism rate also did not vary across state, field, crop growth stages or crop  
608 stress, suggesting there are no clear trends against these factors.

609

610 *4.5. Conclusion*

611

612 Observed and actual parasitism rates of *M. persicae* can vary considerably, due to a number of  
613 variables ranging from climatic factors to faunal composition. Parasitoid species, however, appeared  
614 to have no effect on the difference between observed and actual parasitism rates. On a state, field  
615 and sampling point level, actual parasitism was usually higher than that observed in the field.

616 Average actual parasitism rate was over double that observed, and even more pronounced in SA,  
617 with mummy counts usually an underestimate of actual parasitism rates. This provides an incentive  
618 to incorporate natural enemies into pest management programs. Consequently, mummy counts  
619 alone do not provide a clear representation of parasitism within the field and can vary across  
620 geographic areas or within growing seasons.

621

## 622 **Acknowledgements**

623

624 We would like to acknowledge Andy Hulthen at CSIRO for his creation of the mobile software  
625 application. Furthermore, we would like to thank the growers and agronomists who assisted with  
626 this project and/or provided access to their land. We further extend our gratitude to Sarina  
627 Macfadyen for her supervision, Katie Robinson and Moshe Jasper for their assistance with genetic  
628 work and training, Vincent Chea for his GIS expertise, and Erica Marshall for her help with R  
629 software. This research initiative is a GRDC investment that seeks to deliver new knowledge to  
630 improve the timing of pest management decisions in grain crops to grain growers: CSE00059. This  
631 work was further supported by the Albert Shimmins Fund.

632

## 633 **Conflict of Interest Declaration**

634

635 The authors declare no conflict of interest.

636

## 637 References

638

- 639 1 Zeck EH, The green peach aphid, *Myzus persicae* (Sulzer). *Agricultural Gazette, New South*  
640 *Wales* **43**:611-616 (1928).
- 641 2 Waterhouse DF and Sands DPA. Classical Biological Control of Arthropods in Australia, CSIRO  
642 Publishing, Canberra (2001).
- 643 3 Van Emden HF, Eastop VF, Hughes RD and Way M J. Ecology of *Myzus persicae*. *Annual*  
644 *Review of Entomology*, **14**:197-270 (1969).
- 645 4 Godfray HCJ. Parasitoids, behavioral and evolutionary ecology, Princeton University Press,  
646 Princeton (NJ), 488 p (1994).
- 647 5 Powell W, Walton MP and Jervis MA. Populations and communities, in *Insect Natural*  
648 *Enemies*, ed. by Jervis MA and Kidd N, Chapman & Hall, London, pp. 223-292 (1996).
- 649 6 Bodlah I, Muhammad N and Ul Mohsin A. Distribution, Hosts and Biology of *Diaeretiella*  
650 *rapae* (M'Intosh) (Hymenoptera: Braconidae: Aphidiinae) in Punjab, Pakistan. *Pakistan*  
651 *Journal of Zoology* **44**:1307-1315 (2012).
- 652 7 Nielsen C and Hajek AE. Control of Invasive Soybean Aphid, *Aphis glycines* (Hemiptera:  
653 Aphididae), Populations by Existing Natural Enemies in New York State, with Emphasis on  
654 Entomopathogenic Fungi. *Environmental Entomology* **34**:1036-1047 (2005).
- 655 8 Walton MP, Powell W, Loxdale HD and Allen-Williams L. Electrophoresis as a tool for  
656 estimating levels of hymenopterous parasitism in field populations of the grain aphid,  
657 *Sitobion avenae* (F.) (Hemiptera: Aphididae). *Entomologia Experimentalis Et Applicata*  
658 **54**:271-279 (1990).
- 659 9 Giles KL., Jones BG, Royer TA, Elliott NC and Kindler SD. Development of a sampling plan in  
660 winter wheat that estimates cereal aphid parasitism levels and predicts population  
661 suppression. *Journal of Economic Entomology* **96**:975-982 (2003).
- 662 10 Public Service Mapping Agency. 2020. Administrative boundaries.  
663 [https://data.gov.au/dataset/ds-dga-bdcf5b09-89bc-47ec-9281-](https://data.gov.au/dataset/ds-dga-bdcf5b09-89bc-47ec-9281-6b8e9ee147aa/details?q=PSMA_administrative_boundaries)  
664 [6b8e9ee147aa/details?q=PSMA\\_administrative\\_boundaries](https://data.gov.au/dataset/ds-dga-bdcf5b09-89bc-47ec-9281-6b8e9ee147aa/details?q=PSMA_administrative_boundaries) [Accessed 28.05.2020]
- 665 11 Department Of Agriculture And Water Resources. 2020. MCAS-S Data.  
666 <http://mcas.ternlandscapes.net.au/mcas-s/data.html> [Accessed 28.05.2020]
- 667 12 Sarwar M. Comparative suitability of soil and foliar applied insecticides against the aphid  
668 *Myzus persicae* (Sulzer) (Aphididae: Hemiptera) In canola *Brassica napus* L. *International*  
669 *Journal of Scientific Research in Environmental Sciences (IJSRES)* **1**:138-143 (2013).
- 670 13 Hartung C, Lerer A, Anokwa Y, Tseng C, Brunette W and Borriello G. Open data kit: Tools to  
671 build information services for developing regions. Proceedings of the 4th ACM/IEEE  
672 International Conference on Information and Communication Technologies and  
673 Development (ICTD); 2010 Dec 13-16; London, UK (2010).
- 674 14 Rakhshani E, Kazemzadeh S, Starý P, Barahoei H, Kavallieratos NG, Četković A, Popović A,  
675 Bodlah I and Tomanović Z. Parasitoids (Hymenoptera: Braconidae: Aphidiinae) of  
676 northeastern Iran: Aphidiine-aphid-plant associations, key and description of a new species.  
677 *Journal of Insect Science* **12**:143 (2012).
- 678 15 Rakhshani E, Starý P, Tomanović Z and Mifsud D. Aphidiinae (Hymenoptera, Braconidae)  
679 aphid parasitoids of Malta: review and key to species. *Bulletin of the Entomological Society*  
680 *of Malta* **7**:121-137 (2015).
- 681 16 Walsh PS, Metzger DA and Higuchi R. Chelex-100 as a medium for simple extraction of DNA  
682 for PCR-based typing from forensic material. *Biotechniques* **10**:506-513 (1991).



- 683 17 Carew ME, Pettigrove V and Hoffmann AA. Identifying chironomids (Diptera : Chironomidae)  
684 for biological monitoring with PCR-RFLP. *Bulletin of Entomological Research* **93**:483-490  
685 (2003).
- 686 18 Folmer O, Black M, Hoeh W, Lutz R and Vrijenhoek R. DNA primers for amplification of  
687 mitochondrial cytochrome c oxidase subunit I from diverse metazoan invertebrates.  
688 *Molecular Marine Biology And Biotechnology* **3**:294-299 (1994).
- 689 19 Ratnasingham S and Hebert PDN. Barcoding BOLD: The Barcode of Life Data System  
690 ([www.barcodinglife.org](http://www.barcodinglife.org)). *Molecular Ecology Notes* **7**:355–364 (2007).
- 691 20 Warton DI and Hui FK. The arcsine is asinine: the analysis of proportions in ecology. *Ecology*  
692 **92**:3-10 (2011).
- 693 21 Minitab. 2019. Minitab 19 Statistical Software. <http://www.minitab.com/> [Accessed  
694 28.11.2020]
- 695 22 R Core Team 2020. R: A Language and Environment for Statistical Computing; R Foundation  
696 for Statistical Computing. Vienna, Austria.
- 697 23 RStudio Team 2020. RStudio: Integrated Development Environment for R. Boston, MA, USA:  
698 RStudio, Inc.
- 699 24 Neuville S, Le Ralec A, Outreman Y and Jaloux B. The delay in arrival of the parasitoid  
700 *Diaeretiella rapae* influences the efficiency of cabbage aphid biological control. *Biocontrol*  
701 **61**:115-126 (2016).
- 702 25 Roschewitz I, Hücker M, Tscharnkte T and Thies C. The influence of landscape context and  
703 farming practices on parasitism of cereal aphids. *Agriculture, Ecosystems & Environment*  
704 **108**:218-227 (2005).
- 705 26 Plečas M, Gagić V, Janković M, Petrović-Obradović O, Kavallieratos NG, Tomanović Z, Thies C,  
706 Tscharnkte T and Četković A. Landscape composition and configuration influence cereal  
707 aphid-parasitoid-hyperparasitoid interactions and biological control differentially across  
708 years. *Agriculture Ecosystems & Environment* **183**:1-10 (2014).
- 709 27 Hughes GE, Sterk G and Bale JS. Thermal biology and establishment potential in temperate  
710 climates of the aphid parasitoid, *Lysiphlebus testaceipes*. *BioControl* **56**:19-33 (2011).
- 711 28 Klein ML, Rondon SI, Walenta DL, Zeb Q and Murphy AF. Spatial and temporal dynamics of  
712 aphids (Hemiptera: Aphididae) in the Columbia Basin and Northeastern Oregon. *Journal of*  
713 *Economic Entomology* **110**:1899-1910 (2017).
- 714 29 Swenson KG. Role of aphids in the ecology of plant viruses. *Annual Review of*  
715 *Phytopathology* **6**:351-374 (1968).
- 716 30 Ward SE, Umina PA, Macfadyen S and Hoffmann AA. Hymenopteran parasitoids of aphid  
717 pests within Australian grain production landscapes. *Insects* **12**(1):44 (2021).
- 718 31 Maino J, Pirtle E, van Helden M, Heddle T and Umina A. 2020. How does climate affect the  
719 green bridge (and consequently aphid risk)? [https://grdc.com.au/resources-and-](https://grdc.com.au/resources-and-publications/grdc-update-papers/tab-content/grdc-update-papers/2020/02/how-does-climate-affect-the-green-bridge-and-consequently-aphid-risk)  
720 [publications/grdc-update-papers/tab-content/grdc-update-papers/2020/02/how-does-](https://grdc.com.au/resources-and-publications/grdc-update-papers/tab-content/grdc-update-papers/2020/02/how-does-climate-affect-the-green-bridge-and-consequently-aphid-risk)  
721 [climate-affect-the-green-bridge-and-consequently-aphid-risk](https://grdc.com.au/resources-and-publications/grdc-update-papers/tab-content/grdc-update-papers/2020/02/how-does-climate-affect-the-green-bridge-and-consequently-aphid-risk) [Accessed 28.03.2021]
- 722 32 Zamani AA, Talebi A, Fathipour Y and Baniameri V. Effect of temperature on life history of  
723 *Aphidius colemani* and *Aphidius matricariae* (Hymenoptera : Braconidae), two parasitoids of  
724 *Aphis gossypii* and *Myzus persicae* (Homoptera : Aphididae). *Environmental Entomology*  
725 **36**:263-271 (2007).
- 726 33 Bernal J and Gonzalez D. Temperature requirements of 4 parasites of the Russian wheat  
727 aphid *Diuraphis-noxia*. *Entomologia Experimentalis Et Applicata* **69**:173-182 (1993).
- 728 34 Romo CM and Tylanakis JM. Elevated temperature and drought interact to reduce parasitoid  
729 effectiveness in suppressing hosts. *PLoS ONE* **8**:e58136 (2013).
- 730 35 Žikić V, Lazarević M and Milošević D. Host range patterning of parasitoid wasps Aphidiinae  
731 (Hymenoptera: Braconidae). *Zoologischer Anzeiger* **268**:75-83 (2017).



- 732 36 Hafez M. Seasonal fluctuations of population density of the Cabbage Aphid, *Brevicoryne*  
733 *brassicae* (L.) in the Netherlands and the role of its parasite, *Aphidus* (*Diaeretiella*) *rapae*  
734 (Curtis). *Tijdschrift Over Plantenziekten* **67**:445-548 (1961).  
735 37 Lester PJ and Holtzer TO. Patch and prey utilization behaviors by *Aphelinus albipodus* and  
736 *Diaeretiella rapae* (Hymenoptera : Aphelinidae and Aphidiidae) on Russian wheat aphid  
737 (Homoptera : Aphididae). *Biological Control* **24**:183-191 (2002).  
738 38 Shukla AN, Singh R and Tripathi CPM. Effect of food plants on the functional response of an  
739 aphid parasitoid *Diaeretiella rapae* (McIntosh)(Hymenoptera:Aphidiidae). *Phytophaga* **4**:53-  
740 60 (1992).  
741 39 Vaughn TT, Antolin MF and Bjostad LB. Behavioral and physiological responses of  
742 *Diaeretiella rapae* to semiochemicals. *Entomologia Experimentalis Et Applicata* **78**:187-196  
743 (1996).  
744 40 Rehman A and Powell W. Host selection behaviour of aphid parasitoids (Aphidiidae:  
745 Hymenoptera). *Journal of Plant Breeding and Crop Science* **2**:299-311 (2010).  
746 41 Read DP, Feeny PP and Root RB. Habitat selection by the aphid parasite *Diaeretiella rapae*  
747 (Hymenoptera: Braconidae) and hyperparasite *Charips brassicae* (Hymenoptera: Cynipidae).  
748 *The Canadian Entomologist* **102**:1567-1578 (1970).  
749 42 Müller CB and Godfray HCJ. Indirect interactions in aphid-parasitoid communities.  
750 *Researches on Population Ecology* **41**:93-106 (1999).  
751

## 752 Tables

753  
754 *Table 1*: Results of GLMs testing the effects of state, field, crop growth stage and crop stress on *M.*  
755 *persicae* numbers, and proportions of alates, mummies, and reared parasitoids considered at the  
756 field level.

| Organism & measurement                             | Factor                      | MS     | F(df1, df2)              | P                |
|----------------------------------------------------|-----------------------------|--------|--------------------------|------------------|
| <b>Mean <i>Myzus persicae</i> abundance</b>        | State                       | 5.811  | 11.64 <sub>(3, 19)</sub> | <b>&lt;0.001</b> |
|                                                    | Field (nested within state) | 0.563  | 1.13 <sub>(19, 35)</sub> | 0.369            |
|                                                    | Crop growth stage           | 1.180  | 2.36 <sub>(2, 35)</sub>  | 0.109            |
|                                                    | Crop stress                 | 0.864  | 1.73 <sub>(1, 35)</sub>  | 0.197            |
|                                                    | Error                       | 0.499  |                          |                  |
| <b>Proportion of alates</b>                        | State                       | 5.158  | 4.84 <sub>(3, 17)</sub>  | <b>0.009</b>     |
|                                                    | Field (nested within state) | 0.583  | 0.55 <sub>(17, 25)</sub> | 0.899            |
|                                                    | Crop growth stage           | 1.545  | 1.45 <sub>(2, 25)</sub>  | 0.253            |
|                                                    | Crop stress                 | 1.177  | 1.11 <sub>(1, 25)</sub>  | 0.303            |
|                                                    | Error                       | 1.065  |                          |                  |
| <b>Proportion of mummies</b>                       | State                       | 5.599  | 3.85 <sub>(3, 19)</sub>  | <b>0.019</b>     |
|                                                    | Field (nested within state) | 2.311  | 1.59 <sub>(19, 30)</sub> | 0.125            |
|                                                    | Crop growth stage           | 41.643 | 28.61 <sub>(2, 30)</sub> | <b>&lt;0.001</b> |
|                                                    | Crop stress                 | 0.003  | 0.00 <sub>(1, 30)</sub>  | 0.962            |
|                                                    | Error                       | 1.456  |                          |                  |
| <b>Proportion of reared parasitoids (exc. NSW)</b> | State                       | 2.088  | 1.78 <sub>(2, 14)</sub>  | 0.192            |
|                                                    | Field (nested within state) | 1.212  | 1.03 <sub>(14, 23)</sub> | 0.459            |
|                                                    | Crop growth stage           | 6.461  | 5.50 <sub>(2, 23)</sub>  | <b>0.011</b>     |
|                                                    | Crop stress                 | 4.903  | 4.17 <sub>(1, 23)</sub>  | 0.053            |
|                                                    | Error                       | 1.175  |                          |                  |

757

758

## 759 Figure legends

760

761 *Figure 1*: Map of field sites in each state: a) NSW, b) SA, c) VIC, and d) WA (inset maps depict states  
762 on Australian map) (Public Service Mapping Agency, 2020, Department of Agriculture and Water  
763 Resources, 2020).

764

765 *Figure 2:* Box plots showing by state, a) *M. persicae* abundance, and the percentage of b) alates, c)  
766 mummies and d) reared parasitoids on fields excluding those in NSW. [Outliers are indicated by  
767 single asterisks. Different letters indicate significant differences between states in post hoc tests].

768

769 *Figure 3:* Box plots displaying effects of crop growth stage on a) percentage of samples collected as  
770 mummies per state and b) the percentage of samples collected which reared parasitoids per state.  
771 [Outliers are indicated by single asterisks. A post hoc test found the percentage of mummies from  
772 total aphids collected was significantly higher during the podding/senescing crop growth stage than  
773 during flowering or flowering/podding]. A post hoc test found the percentage of mummies from  
774 total aphids collected was significantly higher during the podding/senescing crop growth stage than  
775 during flowering].

776

777 *Figure 4:* Box plots displaying effects of a) states and b) crop growth stage on the difference between  
778 the number of parasitoids reared and the mummies collected [Outliers are indicated by single  
779 asterisks].

780

781 *Figure 5:* Box plot displaying effects of state on the difference between the number of parasitoids  
782 reared from field aphids and those reared from field mummies (number of parasitoids from field  
783 mummies subtracted by parasitoids from field aphids) per field. [Outliers are indicated by single  
784 asterisks. Different letters indicate significant differences between growth stages in posthoc tests].

785

786 *Figure 6:* Parasitoid composition within canola crops during the different crop growth stages. Note  
787 sample sizes below pie chart.
